# Supplementary material
Source: PubMed Central journal article supplement (PMC3416114)
Supplement: JVI.00472-12_zjv999096418so1.pdf [file JVI.00472-12_zjv999096418so1.pdf]

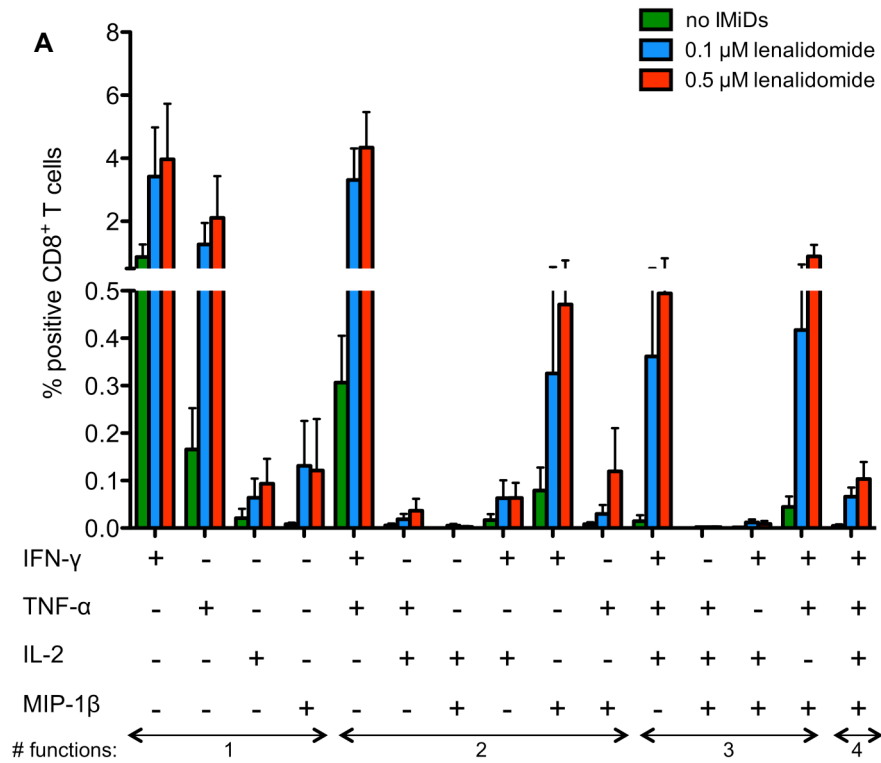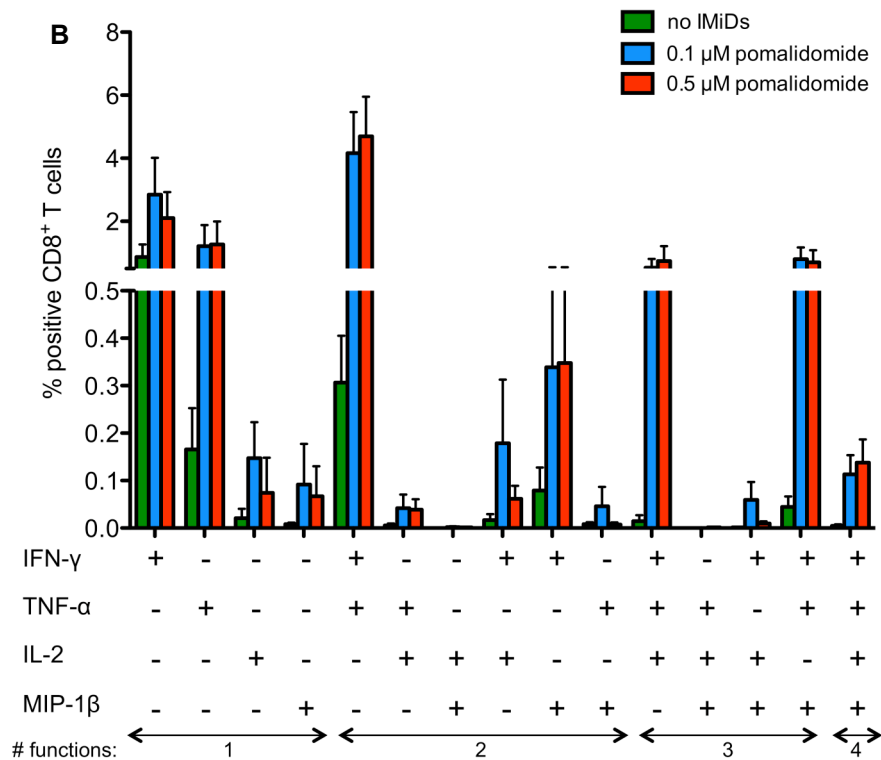

**Supplemental figure 1. IMiDs increase the number of polyfunctional CD8<sup>+</sup> T cells.**

Purified CD8<sup>+</sup> T cells were stimulated with DCs electroporated with mRNA encoding Gag or Nef. After 10 days of stimulation, the cells were co-cultured overnight with DCs electroporated with Gag or Nef encoding mRNA to measure antigen-specific cytokine production. The graphs show the CD8<sup>+</sup> T cells expressing different combinations of IFN- $\gamma$ , TNF- $\alpha$ , IL-2 and/or MIP-1 $\beta$ . The bars indicate the mean of 7 experiments. The error bars represent the SEM. The degree of functionality for each type of T-cell response is indicated under the graph. Panels A and B show the effects of lenalidomide and pomalidomide on polyfunctional CD8<sup>+</sup> T-cell responses, respectively.

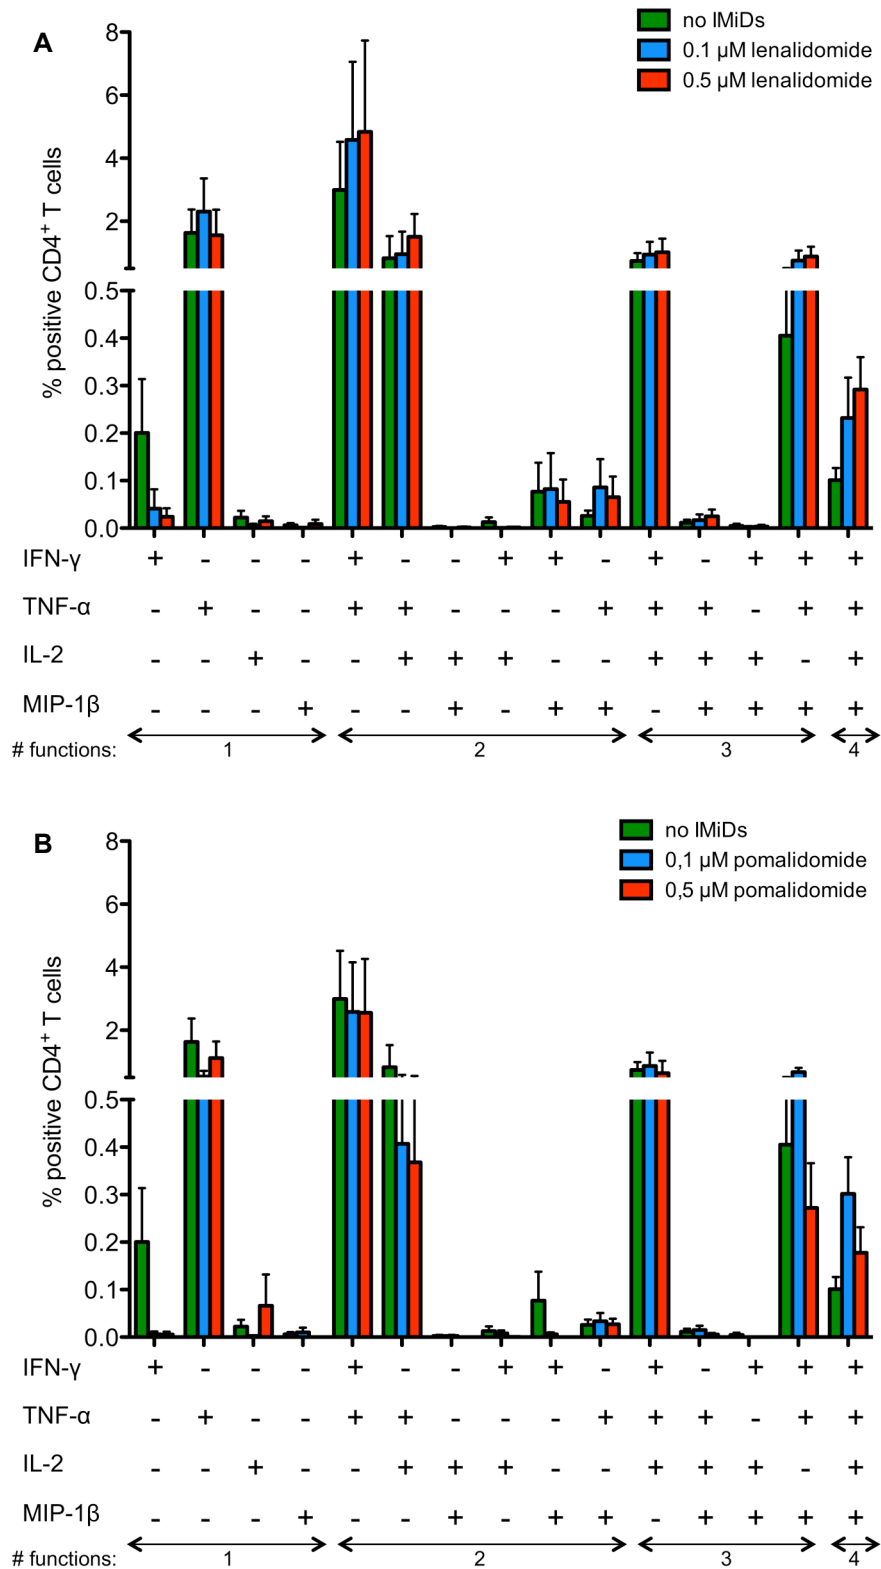

**Supplemental figure 2. Effects of IMiDs on the number of polyfunctional CD4<sup>+</sup> T cells.**

Purified CD4<sup>+</sup> T cells were stimulated with DCs electroporated with mRNA encoding Gag or Nef. After 10 days of stimulation, the cells were co-cultured overnight with DCs electroporated with Gag or Nef encoding mRNA to measure antigen-specific cytokine production. The graphs show the CD4<sup>+</sup> T cells expressing different combinations of IFN-γ, TNF-α, IL-2 and/or MIP-1β. The bars indicate the mean of 6 experiments. The error bars represent the SEM. The degree of functionality for each type of T-cell response is indicated under the graph. Panels A and B show the effects of lenalidomide and pomalidomide on polyfunctional CD4<sup>+</sup> T-cell responses, respectively.
